# 1 **Characterization of Pacific oyster (*Crassostrea gigas*) proteomic response to** 2 **natural environmental differences**

3 Running head: Oyster proteomic response to environment

4

5 Yaamini R. Venkataraman<sup>1</sup>, Emma Timmins-Schiffman<sup>2</sup>, Micah J. Horwith<sup>3</sup>, Alexander T. Lowe<sup>4</sup>,  
6 Brook Nunn<sup>2</sup>, Brent Vadopalas<sup>1</sup>, Laura H. Spencer<sup>1</sup>, Steven B. Roberts\*<sup>1</sup>

7 <sup>1</sup>School of Aquatic and Fishery Sciences, University of Washington, Seattle, Washington 98105,  
8 United States

9 <sup>2</sup>Department of Genome Sciences, University of Washington, Seattle, Washington 98105,  
10 United States

11 <sup>3</sup>Washington Department of Natural Resources, Olympia, Washington 98504, United States

12 <sup>4</sup>Department of Biology, University of Washington, Seattle, Washington 98105, United States

## 13 **Abstract**

14 Global climate change is rapidly altering coastal marine ecosystems important for food  
15 production. A comprehensive understanding of how organisms will respond to these  
16 complex environmental changes can come only from observing and studying species  
17 within their natural environment. To this end, the effects of environmental drivers — pH,  
18 dissolved oxygen content, salinity, and temperature — on *Crassostrea gigas* physiology  
19 were evaluated in an outplant experiment. Sibling juvenile oysters were outplanted to  
20 eelgrass and unvegetated habitat at five different estuarine sites within the Acidification  
21 Nearshore Monitoring Network in Washington State, USA to evaluate how regional  
22 environmental drivers influenced molecular physiology. We tested effects environmental  
23 conditions at outplant sites and habitat to determine if macrophyte presence and diurnal  
24 cycling buffered pH conditions and changed the oysters' expressed proteome. A novel,  
25 two-step, gel-free proteomic approach was used to identify differences in protein  
26 abundance in *C. gigas* ctenidia tissue after a 29 day outplant by 1) identifying proteins in  
27 a data independent acquisition survey step and 2) comparing relative quantities of  
28 targeted environmental response proteins using selected reaction monitoring. While  
29 there was no difference in protein abundance detected between habitats or within Puget  
30 Sound, *C. gigas* outplanted at Willapa Bay had significantly higher abundances of  
31 antioxidant enzymes and carbohydrate metabolism proteins. Environmental factors at  
32 Willapa Bay, such as higher average temperature, could have driven this protein  
33 abundance pattern. These findings generate a suite of new hypotheses for lab and field  
34 experiments to compare the effects of regional conditions on physiological responses of  
35 marine invertebrates.

36

37 *Keywords: proteomics, oysters, in situ measurements, estuarine systems, antioxidant*  
38 *enzymes, carbohydrate metabolism*

## 39 **Introduction**

40 Global climate change will influence estuarine dynamics and impact the  
41 organisms that inhabit these environments. Estuaries are already variable across spatial  
42 and temporal scales in terms of phytoplankton production (Pennock and Sharp 1986),  
43 nutrient availability, (Paerl et al. 2014), heavy metal contamination (Liu et al. 2015),  
44 salinity (Banas et al. 2004), and carbonate chemistry (Pelletier et al. 2018; Feely et al.  
45 2010; Ruesink et al. 2015; Baumann and Smith 2018). Since climate change will affect  
46 these parameters, it is important to consider how estuarine organisms will respond.

47 Proteomics, or the study of protein abundance and expression, can be used to  
48 shed light on physiological changes on a molecular level. Proteins direct all major  
49 cellular functions, thus examining protein abundance provides direct evidence of an  
50 organism's physiological response to the estuarine environment (Tomanek 2014). The  
51 proteome is dynamic, as it must rapidly respond to perturbation, providing mechanistic  
52 information that standard gene expression and mRNA quantification studies cannot  
53 (Veldhoen, Ikonomidou, and Helbing 2012; Flores-Nunes, Gomes, et al. 2015). As a  
54 result of the proteome's dynamic nature, proteins analyzed at the time of collection  
55 represent an organism's response to the environment in near real-time. Discovery-  
56 based proteomic methods can unbiasedly elucidate responses to environmental drivers  
57 (Flores-Nunes, Gomes, et al. 2015). Several studies have connected protein  
58 abundances with changes in laboratory-simulated environmental conditions, identifying  
59 key proteins and mechanisms involved in specific environmental responses (Timmins-  
60 Schiffman et al. 2014; Tomanek 2014; Papakostas et al. 2012; Meng et al. 2017; Parker  
61 et al. 2011; Dineshram et al. 2016). While these studies provide insight into organismal

62 adaptation and physiology, laboratory studies alone cannot fully encapsulate the effects  
63 of multiple environmental drivers within an ecosystem context (Riebesell and Gattuso  
64 2014).

65 Although challenging, *in situ* field studies provide a necessary biological realism  
66 when considering variable environments (Cornwall and Hurd 2016; Slattery et al. 2012).  
67 Such experiments can be leveraged to study the effects of multiple environmental  
68 drivers on organismal physiology and to incorporate realistic variability, as opposed to  
69 examining the effect of a single stressor on an organism (Riebesell and Gattuso 2014).  
70 Through transcriptomics Chapman et al. (2011) demonstrated the power of an *in situ*  
71 experimental design for examining the impacts of regional environmental conditions on  
72 Eastern oyster (*Crassostrea virginica*) physiology. Transcript signatures from *C.*  
73 *virginica* sampled from various locations in southeastern United States revealed that  
74 temperature, pH, salinity, dissolved oxygen and pollutant load at each location impacted  
75 gene expression. Furthermore, they were able to disentangle the interactions of these  
76 environmental factors on gene expression. RNA and protein abundances can be  
77 influenced by several environmental factors, and *in situ* studies can determine which  
78 drivers will be more important to consider for organismal physiology.

79 Marine invertebrates have proven to be informative bioindicators in proteomic  
80 studies to examine the effects of *in situ* conditions on organismal physiological  
81 responses to environmental change. When marine invertebrates have been exposed to  
82 varying environmental conditions, proteomics has demonstrated changes in cellular  
83 defense, immune responses, and genome function (Veldhoen, Ikonomou, and Helbing  
84 2012). Changes in protein abundance in bivalves like blue mussels (*Mytilus edulis* spp.)

85 and the Pacific oyster (*Crassostrea gigas*) have been used to develop biomarkers for  
86 environmental contaminants (Beyer et al. 2017; Slattery et al. 2012). Proteomic  
87 responses to natural environmental drivers have also been evaluated in bivalves. For  
88 example, shotgun proteomic analysis of *M. edulis* ctenidia from Baltic Sea microcosms  
89 revealed that low salinity conditions impact abundance of cytoskeleton proteins and  
90 signalling and intracellular membrane trafficking pathways (Campos et al. 2016). With a  
91 growing wealth of genomic information for these species, and the importance of this  
92 information for commercial aquaculture, understanding how these species fare under  
93 different environmental conditions is critical.

94 Pacific oyster (*Crassostrea gigas*) rearing in estuarine environments in  
95 Washington State, USA provides a perfect system to examine the effect of *in situ*  
96 environmental conditions on the expressed proteome. *C. gigas* are extensively farmed  
97 in two different estuarine systems that show substantial regional variation: Puget Sound  
98 and Willapa Bay. Puget Sound is a complex estuarine system with interconnected sub-  
99 basins, each with different freshwater inputs, residence times, and stratification levels  
100 (Feely et al. 2010; Pelletier et al. 2018; Bianucci et al. 2018). Willapa Bay is a large  
101 shallow estuary on the Pacific coast that exchanges approximately half its water volume  
102 with the Pacific Ocean at each tide (Banas et al. 2004, 2007). Seasonality and location  
103 within Puget Sound dictates temperature, dissolved oxygen, salinity, and pH conditions,  
104 while Willapa Bay conditions are influenced by diurnal fluctuations and proximity to  
105 either the ocean or rivers draining into the bay (Pelletier et al. 2018; Feely et al. 2010;  
106 Banas et al. 2007; Ruesink et al. 2015). Both Puget Sound and Willapa Bay also host  
107 eelgrass beds (*Zostera spp.*) that affect environmental conditions, such as oxygen

108 concentrations, on diurnal time scales and may provide refuge from ocean acidification  
109 or rapid change in temperature through photosynthetic activity. Understanding how  
110 different aquaculture grow-out locations and habitats will affect the oyster's ability to  
111 persist through environmental change is crucial for the industry and the ecosystem.

112         The purpose of this study was to use proteomic techniques to uncover the  
113 impacts of environmental drivers on Pacific oyster physiological outcomes in estuarine  
114 environments in Washington State, USA. Naturally existing environmental variation was  
115 harnessed by outplanting *C. gigas* in different locations within Puget Sound and Willapa  
116 Bay, and habitat effects were taken into consideration by placing oysters in eelgrass  
117 and unvegetated habitats. Gel-free proteomic methods were used to examine the  
118 effects of outplant conditions on relative quantities of all expressed proteins in a series  
119 of *in situ* experiments in order to identify differentially abundant proteins. We predicted  
120 that differences in environmental drivers at each outplant location and within outplant  
121 habitats would yield unique protein abundance patterns. Oysters at outplant locations  
122 with higher temperatures, lower dissolved oxygen content, lower salinity, or lower pH  
123 may have higher abundances of proteins related to environmental response. Eelgrass  
124 beds were expected to ameliorate stressful conditions, resulting in lower abundances of  
125 environmental stress response proteins than oysters in unvegetated habitats.

## 126 **Methods**

### 127 ***Shellfish deployment***

128         Sibling *C. gigas* (average shell length = 27.2 cm) were outplanted for 29 days  
129 starting June 19, 2016 at five locations: Case Inlet (CI), Fidalgo Bay (FB), Port Gamble

130 Bay (PG), Skokomish River Delta (SK), and Willapa Bay (WB) in Washington State,  
131 USA (Table 1; Figure S1). These sites were selected for differences in environmental  
132 parameters, as well as for the presence of unvegetated areas and eelgrass beds within  
133 each site. All sites were part of the Acidification Nearshore Monitoring Network, a  
134 network of sensors placed in various Washington locations to monitor marine chemistry  
135 (ANeMoNe; Washington Department of Natural Resources). At each site, fifteen  
136 juvenile oysters were placed in bags directly onto the substrate at a tidal height of -1.5  
137 MLLW, both inside and outside of eelgrass beds (n=15 per habitat type), for a total of  
138 thirty outplanted oysters per site. Oysters were housed in exclusion cages to prevent  
139 predation. Custom-built Durafet-based sensors (Honeywell) were used to monitor pH.  
140 Commercially-available MiniDOT loggers (Precision Measurement Engineering) were  
141 used to measure dissolved oxygen, and Odyssey loggers were used to measure  
142 conductivity. All sensors recorded temperature measurements, and all sensors logged  
143 at 10-minute intervals across the outplant period, with the exception of SK, where  
144 sensors were installed 21 days into the outplant period.

145 Juvenile oysters remained at each site for a 29-day exposure period. Oyster shell  
146 length was measured before and after the outplant period. Because the ctenidia is the  
147 primary site where oysters interact with the environment, ctenidia samples were  
148 dissected at the end of the outplant and held on dry ice until storage at -80°C (Beyer et  
149 al. 2017; Meng et al. 2017; Meistertzheim et al. 2007).

150 Environmental data was treated as follows. Conductivity observations were  
151 removed when less than 0, which occurs when the instrument is dry. Remaining  
152 observations were converted to salinity measurements using the *swSCTp* function in

153 the oce package in R (Kelley and Richards 2018; R Core Team 2018), with temperature  
154 at 25°C and pressure at 10 dbar. For dissolved oxygen, pH, and salinity datasets, data  
155 were removed when collected by probes 1) during low tide or 2) when tidal depth was  
156 less than one foot to remove readings where the probes may have been exposed.  
157 These values were retained for temperature datasets. Outliers were screened using the  
158 Tukey method for temperature, dissolved oxygen, pH, and salinity datasets (Hoaglin,  
159 Iglewicz, and Tukey 1986). Uniform outplant tidal heights were checked using *prop.test*  
160 in R (R Core Team 2018). R Scripts are available in the supplementary Github  
161 repository (S2).

## 162 ***Protein Discovery***

163 To identify select protein targets for characterization across locations and  
164 environmental conditions, a subset of tissue samples (2 from each site) were analyzed  
165 with data independent acquisition (DIA) mass spectrometry analysis (Table S3).

## 166 Protein Quantification

167 Tissue samples were homogenized in a solution of 50 mM  $\text{NH}_4\text{HCO}_3$  with 6M  
168 Urea (500 $\mu\text{l}$ ). Tissues were then sonicated 3 times (Fisher Scientific Sonic  
169 Dismembrator Model 100) for 10 seconds each and cooled between sonications in a  
170 bath of ethanol and dry ice. Protein quantities were measured with the ThermoScientific  
171 BCA Protein Assay Kit microplate assay with a limited quantity of sonicated sample (11  
172  $\mu\text{L}$ ). The protein concentration was measured via spectroscopy at 540 nm in a  
173 Labsystems (Waltham, MA) Multiskan MCC/340 and accompanying Ascent Software

174 Version 2.6. Protein concentrations were calculated based on a standard curve with  
175 BSA (Pierce) per manufacturer's instructions.

## 176 Protein Digestion

177 Protein digestion followed the protocol outlined in Timmins-Schiffman et al.  
178 (2013). To each sample of 30  $\mu$ g protein, 1.5 M Tris pH 8.8 buffer (6.6  $\mu$ L) and 200 mM  
179 TCEP (2.5  $\mu$ L) were added. After solvent additions, each sample's pH was verified to be  
180 basic (pH  $\geq$  8), and placed on a 37°C heating block for one hour. Iodoacetamide (200  
181 mM, 20  $\mu$ L) was then added to each sample to maximize digestion enzyme access to  
182 protein cleavage sites. Samples were covered with aluminum foil to incubate in the dark  
183 for 1 hour at room temperature. Afterwards, dithiothreitol (200 mM, 20  $\mu$ L) was added  
184 and samples were incubated at room temperature for one hour. Lysyl Endopeptidase  
185 (Wako Chemicals) was then added to each sample in a 1  $\mu$ g enzyme:30  $\mu$ g oyster  
186 protein ratio, followed by one hour of incubation at room temperature. Urea was diluted  
187 with  $\text{NH}_4\text{HCO}_3$  (25 mM, 800  $\mu$ L) and HPLC grade methanol (200  $\mu$ L). Trypsin  
188 (Promega) was added to each sample in a 1  $\mu$ g trypsin: 30  $\mu$ g oyster protein ratio for  
189 overnight digestion at room temperature.

## 190 Peptide Isolation

191 After overnight incubation, samples were evaporated to near dryness at 4°C with  
192 a speedvac (CentriVap® Refrigerated Centrifugal Concentrator Model 7310021).  
193 Samples were then reconstituted in 100  $\mu$ L of a 5% Acetonitrile and 0.1%



194 Trifluoroacetic Acid (Solvent B) to isolate peptides. If samples were not at  $\text{pH} \leq 2$ , 10-20  
195  $\mu\text{L}$  aliquots of 10% Formic Acid were added until this pH was achieved.

196 Before desalting peptide samples, Macrospin C18 columns (The Nest Group)  
197 were prepared by adding 200  $\mu\text{L}$  of a 60% Acetonitrile with 0.1% Trifluoroacetic Acid  
198 (Solvent A). The columns were spun for three minutes at 2000 rpm, and flow-through  
199 liquid from the column was discarded. The spinning and discarding process was  
200 completed a total of four times. To wash columns, 200  $\mu\text{L}$  of Solvent B was added to  
201 each column. The columns were once again spun for three minutes at 2000 rpm and  
202 liquid was discarded afterwards; the solvent addition, spinning, and discarding process  
203 was completed a total of three times.

204 To bind peptides to the columns, digested peptides were added to prepared  
205 columns, then the columns were spun at 3000 rpm for three minutes. The filtrate was  
206 pipetted back onto the column and spun again at 3000 rpm for three minutes. Solvent B  
207 (200  $\mu\text{L}$ ) was added to each column three separate times, then the column was spun for  
208 three minutes at 3000 rpm to wash salts off the column.

209 Peptides were eluted with two additions of 100  $\mu\text{L}$  Solvent A to each column.  
210 Columns were spun at 3000 rpm for three minutes and the peptide fraction (filtrate) was  
211 reserved. Samples were placed in a speed vacuum at  $4^{\circ}\text{C}$  until they were nearly dry  
212 (approximately two hours) to dry peptides. Peptides were reconstituted with 60  $\mu\text{L}$  of 3%  
213 Acetonitrile + 0.1% Formic Acid, and stored at  $-80^{\circ}\text{C}$ .

## 214 Internal Standard Addition

215 Peptide Retention Time Calibration (PRTC; Pierce) is a mix of known peptides in  
216 known quantities used as an internal standard to ensure consistency of peptides  
217 detected and measured throughout a mass spectrometry run. The stock solution of  
218 PRTC was diluted to 0.2 pmol/ $\mu$ L PRTC using 3% Acetonitrile with 0.1% Formic Acid. In  
219 a clean centrifuge tube, 6  $\mu$ g of oyster protein and 0.376 pmol of PRTC were mixed  
220 together. Sample volume was brought up to 15  $\mu$ L using a 3% acetonitrile and 0.1%  
221 formic acid solution. A quality control solution was also prepared (1  $\mu$ L PRTC + BSA:3  
222  $\mu$ L 3% Acetonitrile and 0.1% Formic Acid solution).

## 223 *Data Independent Acquisition Mass Spectrometry*

224 Peptides were analyzed on an Orbitrap Fusion Lumos mass spectrometer  
225 (Thermo Scientific) for Data Independent Acquisition Mass Spectrometry (DIA). DIA  
226 analyses were completed as a comprehensive, non-random analytical method for  
227 detecting all peptide ions present within a sample. The detection of peptides was then  
228 leveraged to develop a targeted proteomics assay for quantification (see Selected  
229 Reaction Monitoring Assay). A 30 cm analytical column and 3 cm pre-column were  
230 packed in-house with 3  $\mu$ m C18 beads (Dr. Maisch). Samples were run in a randomized  
231 order. A blank injection followed each sample, with procedural blanks run at the very  
232 end. Every injection was 3  $\mu$ L, which included 1  $\mu$ g of oyster protein and 0.0752 pmol of  
233 PRTC. Peptides were analyzed in MS1 over the  $m/z$  range of 450-950 with 12  $m/z$  wide  
234 windows with 5  $m/z$  overlaps (Egertson et al. 2013). MS1 resolution was 60,000 and  
235 AGC target was 400,000 with a three second cycle time. The MS2 loop count was set to

236 20 and MS2 data was collected with a resolution of 15,000 on charge state of 2 with an  
237 AGC target of 50,000. No dynamic exclusion was used (Table S4).

### 238 ***Peptide-Centric Proteomic Analyses***

239 Unknown peptide spectra from mass spectrometry samples were matched with  
240 known peptides using Peptide-Centric Analysis in the PECAN software (Ting et al.  
241 2015). Raw mass spectrometry files were converted to mzML files, then demultiplexed  
242 using the MSConvert command line interface (S5; Chambers et al. 2012). The *C. gigas*  
243 proteome was digested with in silico tryptic digest using Protein Digestion Simulator  
244 (S6) . All known peptides from the mzML files were identified in an comparison to the  
245 digested *C. gigas* proteome (S6).

246  
247 The PECAN-generated spectral library (.blib) file was used to detect peptides of interest  
248 in raw DIA files in Skyline (MacLean et al. 2010). Skyline identified peptides using  
249 chromatogram peak picking, where ions that elute at the same time and mass are  
250 detected as a peptide (S7). All PRTC peptides and approximately 100 different oyster  
251 proteins and their peptide transitions were manually checked for retention time and  
252 peak area ratio consistency to determine a Skyline auto peak picker error rate (24.3% ±  
253 25%, range: 0% to 100%).

254 Proteins had to satisfy 4 criteria to be considered appropriate targets for the  
255 study. 1) To select proteins for a targeted MS assay, protein data was first evaluated in  
256 Skyline to ensure there was no missing data for any peptide or sample. 2) Peaks with  
257 significant interference were also not considered. 3) Proteins needed at least two  
258 peptides with three transitions per peptide to qualify as a potential target for

259 downstream assays. 4) Proteins with annotated functions related to oxidative stress,  
260 hypoxia, heat shock, immune resistance, shell formation growth and cellular  
261 maintenance were considered for targets to address hypotheses of response to in situ  
262 environmental differences and eelgrass vs. bare habitat. From this list, fifteen proteins  
263 (41 peptides and 123 transitions total), with various environmental response and  
264 general maintenance functions, were selected as targets (Table 2).

### 265 ***Selected Reaction Monitoring Assay***

266 Following the protein discovery phase (DIA), proteins were isolated as described  
267 above from an additional five randomly selected samples per site and habitat  
268 combination (for a total of 5 oysters per group) and analyzed with Selected Reaction  
269 Monitoring (SRM). Samples were prepared as described for DIA, except tissue samples  
270 were homogenized in 100  $\mu$ L, and peptide samples were evaporated at 25°C after  
271 peptide isolation.

272 Proteins of interest identified from the DIA analysis were used as targets in a  
273 SRM assay following the workflow and informatic pipeline of Timmins-Schiffman et al.  
274 2016; 2017. Target peptide transitions were monitored using SRM on a Thermo TSQ  
275 Vantage. SRM data were collected during a gradient of 2-60% acetonitrile over 40  
276 minutes. All samples were run in technical duplicates in a randomized order with a 1  $\mu$ g  
277 oyster peptide and 0.0752 pmol PRTC injection. A quality control injection and blank  
278 injection were run after every five sample injections, and PRTC peptides were  
279 monitored throughout the experiment.

## 280 Target Peptide Specificity

281 To ensure SRM assay specificity to oyster peptides of interest, oyster peptides  
282 were diluted in a background matrix of similar complexity (Pacific geoduck — *Panopea*  
283 *generosa* — peptides), then analyzed using the oyster SRM assay. An oyster-specific  
284 SRM target would decrease in abundance with a decreasing abundance of oyster  
285 peptides in a mixture. Non-specific peptides — more likely to be found in background  
286 matrix of similar complexity — or peptides susceptible to interference would not  
287 correlate with oyster peptide abundance, and therefore, would be uninformative. Five *C.*  
288 *gigas* samples used for SRM were randomly selected and pooled in equal quantities. A  
289 ten-sample oyster:geoduck dilution series was prepared and run using the same  
290 methods as other SRM samples (Table S8).

## 291 Target Analysis

292 Raw SRM files, a background *C. gigas* proteome, and the PECAN spectral  
293 library file from DIA were used to create a Skyline document (S9, S10). Correct  
294 transition peaks were selected based on predicted retention times from DIA results by  
295 comparing the relative retention times between identical PRTC peptides in the DIA and  
296 SRM datasets ( $R^2 = 0.99431$ ). Based on peptide specificity analyses, heat shock protein  
297 70 B2 and one constituent peptide of  
298 glucose-6-phosphate 1-dehydrogenase were removed from analyses (S11).

299 Coefficients of variation were calculated between technical replicates for each  
300 peptide transition. Any sample missing data for more than 50% of peptide transitions  
301 was deemed poor quality for downstream analyses and excluded. Abundance data was  
302 normalized using total ion current (TIC) values from the mass spectrometer.

303 Consistency between technical replicates was verified in remaining samples using a  
304 non-metric multidimensional scaling plot (NMDS) with TIC-normalized data and a  
305 euclidean dissimilarity matrix, and technical replicates were averaged after verification  
306 with the NMDS. Analysis of Variance and post-hoc Tukey's Honest Significant  
307 Difference tests were used to determine significant differences in peptide abundance  
308 among sites for average abundances. The Benjamini-Hochberg method with a false  
309 discovery rate (FDR) of 10% was used to correct for multiple comparisons.

## 310 **Results**

### 311 ***Conditions at Outplant Locations***

312 Over the course of the outplant, Willapa Bay (WB) had the highest average  
313 temperatures (Table 3, Figure S12). There were no large differences in mean pH  
314 between locations (Table 3). Oysters at Case Inlet spent more time at low tide than  
315 those at the other four sites ( $\chi^2 = 25.29$ ,  $df = 4$ ,  $p = 4.408e-05$ ).

### 316 ***Data Independent Acquisition Mass Spectrometry***

317 Out of 39,816 predicted proteins in the *C. gigas* FASTA proteome, 9,047 proteins  
318 were detected in *C. gigas* across five sites and two habitats using DIA (Skyline auto  
319 peak picker error rate  $24.3\% \pm 25\%$ , range: 0% to 100%). Proteins detected included,  
320 but were not limited to, those annotated from processes such as responses to hypoxia  
321 and oxidative stress, removal of superoxide radicals, protein folding, muscle organ  
322 development and negative regulation of apoptosis.

## 323 ***Selected Reaction Monitoring Assay***

324 Differential abundance of protein targets was evaluated at the peptide level after  
325 combining technical replicates (Figure S16, Figure S17). Proteins were considered  
326 differentially abundant if at least one monitored peptide was differentially abundant.  
327 There was no significant difference in SRM peptides between unvegetated and eelgrass  
328 habitats across sites (Figure S18). Abundance data from both habitats were pooled for  
329 downstream analyses comparing protein abundances among sites.

330 Peroxiredoxin-5 (PRX), thioredoxin reductase 3 (TrxR), catalase (EC 1.11.1.6)  
331 (CAT), NAD(P) transhydrogenase (NADPt), glucose-6-phosphate 1-dehydrogenase  
332 (G6PD), protein phosphatase 1B (PP1), and glycogen phosphorylase (GPH) had  
333 differentially abundant peptides between Willapa Bay and the other four locations (Table  
334 S19; ANOVA and Tukey's Honest Significant Difference, FDR = 0.1). These proteins  
335 are either involved in oxidative stress response or related to carbohydrate metabolism  
336 (Table 4).

337 All differentially abundant proteins were detected at higher levels in the WB  
338 oysters than in oysters from the other four PS locations (CI, FB, PG, and SR),  
339 regardless of protein function (Figure 1). No differences in protein abundance were  
340 detected among the PS sites (Table S19; ANOVA and Tukey's Honest Significant  
341 Difference).

## 342 **Discussion**

343 Among sibling Pacific oysters placed at five sites in Washington State, we found  
344 higher abundances of antioxidant enzymes and carbohydrate metabolism proteins in

345 oysters outplanted at Willapa Bay (WB). Significant differences in protein abundances  
346 were detected between WB and all four PS sites; no differences were observed within  
347 PS. Outplanted individuals at WB had higher abundances of antioxidant enzymes and  
348 proteins involved in carbohydrate metabolism. Increased antioxidant activity and  
349 changes in carbohydrate metabolism have been consistently documented as responses  
350 to extreme temperatures, hyposalinity, low pH and air exposure (Tomanek 2014; Zhang  
351 et al. 2015). Higher average temperatures may have driven differential protein  
352 abundances (Table 3, Figures S12).

353 To our knowledge, this is the first time combined use of DIA and SRM analytical  
354 methods have been applied in an ecological context. Previously, both gel-based  
355 (Campos et al. 2016; Tomanek 2014; Zhang et al. 2015; Parker et al. 2011) and gel-free  
356 (Timmins-Schiffman et al. 2014; Timmins-Schiffman et al. 2017; Campos et al. 2016;  
357 Dineshram et al. 2016; Müller et al. 2018) proteomic methods have been used in lab  
358 settings to evaluate the effects of environmental conditions on organismal physiology,  
359 with gel-based methods having a limited dynamic range. Similar gel-free methods has  
360 also been used to examine physiology of other non-model marine species (Kültz et al.  
361 2015; Plumel et al. 2013). Our methods allowed for increased acquisition of proteomic  
362 data for a non-model organism. We detected over 9,000 proteins — far more than  
363 previous studies have detected. The application of a novel, two step, gel-free proteomic  
364 approach broadened the scope of proteins detected in the DIA phase, thus revealing  
365 more possibilities for SRM target design. The SRM assay allowed for increased  
366 detection when protein abundance was relatively low.



367 ***Antioxidant enzymes***

368 Higher antioxidant enzyme abundances can be a direct response to an increase  
369 in reactive oxygen species (ROS) that arise from changes in oxygen conditions (Limón-  
370 Pacheco and Gonsebatt 2009; Zhang et al. 2015). During electron transport, oysters  
371 can produce ROS that induce oxidative stress if not neutralized. (Abele et al. 2007;  
372 Limón-Pacheco and Gonsebatt 2009). Peroxiredoxin-5 (PRX), thioredoxin reductase  
373 (TrxR), and catalase (CAT) scavenge these ROS and degrade them before they cause  
374 cellular harm (Tomanek 2014; Sussarellu et al. 2012; Limón-Pacheco and Gonsebatt  
375 2009; Flores-Nunes, Mattos, et al. 2015; Sussarellu et al. 2010), while NAD(P)  
376 transhydrogenase (NADPt) maintains the cellular redox state. Higher abundances of  
377 antioxidant enzymes in WB oysters suggest the need for ROS scavenging to  
378 acclimatize to local conditions.

379 The shallow bathymetry of WB may have also contributed to elevated ROS and  
380 the increased need for antioxidant enzymes. At high tide, shallow waters would warm  
381 much faster, leading to the observed higher temperatures at WB (Table 1). Warmer  
382 waters at low tide may prompt oysters to spend more times with their shells closed,  
383 producing higher levels of ROS that would need to be neutralized. Lack of oxygen and  
384 higher pCO<sub>2</sub> while the oyster is closed would lead to lower hemolymph pH, causing  
385 higher levels of ROS. Oysters would respond through increased abundance of  
386 antioxidant enzymes (PRX, CAT, TrxR, and NADPt).

387 ROS are produced in response to many environmental changes, thus biomarkers  
388 of ROS scavenging are difficult to link to a single environmental difference in a variable  
389 and complex setting. In particular, reduction of ROS species was found to be a common

390 response to both increased temperatures and aerial exposure in another experiment  
391 with *C. gigas* (Zhang et al. 2015). Because ROS mediation is a conserved response to  
392 several stressors, it is possible that environmental parameters we did not measure (e.g.,  
393 contaminants, microbiota abundance, trace metals) could explain the observed variation  
394 in antioxidant enzyme abundance. Future work at these locations should take these  
395 variables into account.

### 396 ***Carbohydrate metabolism***

397 Higher abundance of carbohydrate metabolism proteins at WB — protein  
398 phosphatase 1B (PP1), glucose-6-phosphate 1-dehydrogenase (G6PD), and glycogen  
399 phosphorylase (GPH) — indicate increased glycogen catabolism at this location (Table  
400 3). Increased glycogen catabolism (PP1 and GPH) has been reported with respect to  
401 environmental drivers (Fuhrmann et al. 2018; Papakostas et al. 2012; Bacca et al. 2005;  
402 Serrano et al. 1993; David et al. 2005). For example, enhanced GPH activity was found  
403 in *M. galloprovincialis* responding to thermal stress to provide more energy during high  
404 temperature acclimation (Serrano et al. 1993). *C. gigas* outplanted at WB could be  
405 using the same process to acclimatize to higher average temperatures. Warmer WB  
406 temperatures could have also sped up basal metabolism, necessitating higher  
407 abundances of PP1 and GPH to catabolize glycogen stores at a faster rate (Wu et al.  
408 1998; She et al. 2015; Bacca et al. 2005). Increasing the amount of energy available to  
409 bivalves by catabolizing glycogen could explain higher abundance of PP1 and GPH in  
410 WB oysters.

411 Increased glycogen catabolism at WB may also be explained by decreased rates  
412 of food capture due to less time spent filter feeding or less food availability at this

413 location. With closed shells, *C. gigas* are unable to filter-feed and would need to  
414 catabolize glycogen for energy, facilitated by increased abundances of PP1 and GPH.  
415 The WB oysters also had lower total fatty acid content when compared to oysters  
416 outplanted at PS locations, indicative of less access to food (less food availability or less  
417 time with valves open for filtration) or poorer quality food (Lowe et al. *in prep*). Whether  
418 due to more time spent with their shells closed or decreased caloric intake, the WB  
419 oysters had to rely on energy stores of glycogen more than oysters throughout Puget  
420 Sound.

421 Higher G6PD abundance in WB oysters indicate that oysters at WB were still  
422 metabolically active. G6PD catalyzes the oxidative portion of the pentose phosphate  
423 pathway, and products from this pathway are often precursors for nucleic and aromatic  
424 amino acids ((L., n.d.)). Additionally, G6PD activity generates NADPH and can indirectly  
425 ameliorate effects of ROS ((L., n.d.)), as demonstrated in *C. gigas*: after exposure to  
426 linear alkylbenzenes and other pollutants, *C. gigas* ctenidia expressed higher G6PD  
427 activity to regulate the redox environment (Flores-Nunes, Mattos, et al. 2015). Increased  
428 abundance of G6PD in WB not only could have maintained transcription and translation  
429 processes, but also levels of cellular and metabolic activity by indirectly dealing with  
430 ROS. Increased G6PD abundance, therefore, provides a link between carbohydrate  
431 metabolism and oxidative stress response in oysters outplanted at Willapa Bay.

### 432 ***Proteomic Responses in Puget Sound and Between Habitats***

433 Due to the observed differences across environmental parameters between  
434 Willapa Bay and Puget Sound locations, similar abundances for proteins involved in  
435 various environmental responses may be evidence of physiological plasticity. One

436 particular protein that we expected to be differentially abundant was heat shock 70 kDA  
437 protein 12A (HSP 12A), since Willapa Bay had higher average temperatures (Table 3).  
438 Higher abundances of heat shock proteins (HSPs) are generally induced when  
439 organisms are exposed to thermal stress (Hamdoun, Cheney, and Cherr 2003; Zhang  
440 et al. 2015; Meistertzheim et al. 2007). In our experiment, average temperatures C.  
441 *gigas* experienced were lower than the threshold to induce elevated HSP expression  
442 (Figure 1; Table 2) (Hamdoun, Cheney, and Cherr 2003). While HSP12A is involved in  
443 a general response to environmental drivers, differentially expressed antioxidant  
444 enzymes and carbohydrate metabolism proteins could be more indicative of molecular  
445 processes required for acclimatization.

446         The lack of differential abundance for protein targets — both among Puget  
447 Sound sites and between unvegetated and eelgrass habitats — was unexpected. These  
448 similar proteomic profiles could be due to three factors. First, it is possible that a  
449 different suite of environmental response proteins in the SRM assay could have yielded  
450 a different view of acclimatization to the various outplant sites; however, the targets we  
451 chose have proven to yield insight into a range of environmental responses in previous  
452 studies. Second, outplant duration could have been too short to capture varied  
453 physiological response within Puget Sound, or oysters could have also acclimatized to  
454 conditions in their outplant locations Finally, is that it is possible that the proteomic  
455 response was not different because the environmental conditions that would elicit up- or  
456 down-regulation of monitored proteins were similar across these five locations (Table 3).  
457 While eelgrass beds are touted as a potential refuge for organisms from the negative  
458 effects of environmental drivers like pH, they can also drive more extreme carbonate

459 chemistry conditions (Pacella et al. 2018). It is possible that the refuge effects and  
460 extreme effects cancelled each other out over the course of our outplant, effectively  
461 making the eelgrass beds just like the unvegetated sites for outplanted oysters. If this is  
462 the case, it would explain why there was no detected difference in protein abundance  
463 between unvegetated and eelgrass habitats.

## 464 **Conclusion**

465         The differential protein abundance observed between sibling oysters placed for  
466 29 days in Willapa Bay or Puget Sound indicates that environmental factors at Willapa  
467 Bay lend themselves to increased antioxidant enzyme and carbohydrate metabolism  
468 protein abundance. Because the observed proteomic responses can be triggered by a  
469 variety of drivers, from a field trial it is difficult to discern if high temperatures or other  
470 environmental factors at WB led to these responses. However, the observed responses  
471 generate a suite of new hypotheses for lab and field experiments comparing the effects  
472 of environmental conditions on physiological responses of marine invertebrates. This is  
473 the first to link regional environmental conditions to physiological responses in Puget  
474 Sound, and one of the first to compare responses between Puget Sound and Willapa  
475 Bay. Linking environmental drivers to other performance metrics, such as growth and  
476 fatty acid composition, is crucial for contextualizing these protein abundance findings  
477 (Lowe et al. *in prep*).

478         Understanding the difference between these two estuaries is important for the  
479 persistence of oyster reefs and aquaculture in the face of climate change. Since  
480 aquaculture species are outplanted in the same location for many months to years, the

481 lack of differential protein abundance among Puget Sound outplants could mean that  
482 environmental response should not be heavily considered when selecting grow-out  
483 locations in this region. Future experiments with a longer outplant duration and multiple  
484 sampling points may provide a clearer connection between environmental drivers,  
485 protein expression, and performance, as well as assist with developing a practical assay  
486 for elucidating stress responses in the field.

487

## 488 **Figures and Tables**

489 **Table 1.** Latitude and longitude of *C. gigas* outplants. Oysters were placed at five  
490 locations sites: Case Inlet (CI), Fidalgo Bay (FB), Port Gamble Bay (PG), Skokomish  
491 River Delta (SK), and Willapa Bay (WB).

| Location | Latitude   | Longitude    |
|----------|------------|--------------|
| CI       | 47.3579367 | -122.7957627 |
| FB       | 48.481691  | -122.58353   |
| PG       | 47.842676  | -122.583832  |
| SK       | 47.35523   | -123.1572    |
| WB       | 46.4944789 | -124.0261356 |

492  
493 **Table 2.** Proteins used as targets for a Selected Reaction Monitoring Assay (SRM).  
494 Targets were identified based on differential abundance and stress-related annotations.  
495 At least two peptides and six transitions were included in the assay for each protein. The  
496 protein Catalase had two isoforms under separate proteome IDs —  
497 CHOYP\_CATA.1.3|m.11120 and CHOYP\_CATA.3.3|m.21642 — and target peptides  
498 were chosen from both IDs. A total of four peptides and twelve associated transitions  
499 were used as SRM targets.

| Protein                    | Proteome ID                 | Number of Peptides | Number of Transitions |
|----------------------------|-----------------------------|--------------------|-----------------------|
| 3-ketoacyl-CoA<br>thiolase | CHOYP_ACAA2.<br>1.1 m.30666 | 3                  | 9                     |

|                                        |                                             |   |   |
|----------------------------------------|---------------------------------------------|---|---|
| Peroxiredoxin-5                        | CHOYP_BRAFLD<br>RAFT_119799.1.<br>1 m.23765 | 2 | 6 |
| Thioredoxin<br>reductase 3             | CHOYP_BRAFLD<br>RAFT_122807.1.<br>1 m.3729  | 3 | 9 |
| Protein phosphatase<br>1B              | CHOYP_BRAFLD<br>RAFT_275870.1.<br>1 m.12895 | 3 | 9 |
| Carbonic anhydrase<br>2                | CHOYP_CAH2.1.<br>1 m.42306                  | 3 | 9 |
| Catalase 1                             | CHOYP_CATA.1.<br>3 m.11120                  | 3 | 9 |
| Catalase 2                             | CHOYP_CATA.3.<br>3 m.21642                  | 1 | 3 |
| Glucose-6-phosphate<br>1-dehydrogenase | CHOYP_G6PD.2.<br>2 m.46923                  | 3 | 9 |
| Heat shock 70 kDa<br>protein           | CHOYP_HS12A.<br>25.33 m.60352               | 2 | 6 |



|                                             |                                        |   |   |
|---------------------------------------------|----------------------------------------|---|---|
| Heat shock protein 70<br>B2                 | CHOYP_HSP74.<br>1.1 m.13095            | 2 | 6 |
| NAD(P)<br>transhydrogenase                  | CHOYP_LOC100<br>633041.1.1 m.354<br>28 | 2 | 6 |
| Glycogen<br>phosphorylase                   | CHOYP_LOC100<br>883864.1.1 m.417<br>91 | 3 | 9 |
| Multidrug resistance-<br>associated protein | CHOYP_MRP1.5.<br>10 m.34368            | 2 | 6 |
| Protein disulfide-<br>isomerase             | CHOYP_PDIA1.1<br>.1 m.5297             | 3 | 9 |
| Protein disulfide-<br>isomerase             | CHOYP_PDIA3.1<br>.1 m.60223            | 3 | 9 |
| Puromycin-sensitive<br>amirase              | CHOYP_PSA.1.1 <br>m.27259              | 3 | 9 |

500

501 **Table 3.** Environmental conditions (mean  $\pm$  standard deviation) at outplant locations  
 502 (Case Inlet (CI), Fidalgo Bay (FB), Port Gamble Bay (PG), Skokomish River Delta (SK),  
 503 Willapa Bay (WB).

| <b>Metric</b>                               | <b>CI</b>    | <b>FB</b>    | <b>PG</b>    | <b>SK</b>    | <b>WB</b>    |
|---------------------------------------------|--------------|--------------|--------------|--------------|--------------|
| <b>Mean Temperature (°C)</b>                | 16.1 ± 1.7   | 14.8 ± 1.8   | 15.1 ± 2.9   | 15.1 ± 2.2   | 18.0 ± 1.3   |
| <b>Mean Salinity (PSU)</b>                  | 24.47 ± 1.35 | 30.20 ± 0.38 | 23.25 ± 1.56 | 13.43 ± 1.04 | 27.28 ± 0.73 |
| <b>Mean Dissolved Oxygen Content (mg/L)</b> | 8.27 ± 1.91  | 9.63 ± 4.59  | 11.70 ± 3.70 | 9.99 ± 4.58  | 8.76 ± 1.78  |
| <b>Mean pH</b>                              | 7.63 ± 0.19  | 7.54 ± 0.23  | 7.33 ± 0.25  | 7.37 ± 0.24  | 7.56 ± 0.18  |

504

505 **Table 4.** Functions of differentially abundant proteins

| <b>Protein</b>        | <b>Function</b>                                                                     | <b>Citations</b>                     |
|-----------------------|-------------------------------------------------------------------------------------|--------------------------------------|
| Peroxiredoxin-5 (PRX) | Scavenges ROS located in mitochondria using cysteine residuals to reduce substrates | Tomanek 2014; Sussarellu et al. 2012 |
| Thioredoxin reductase | Thiol-specific antioxidant                                                          | Limón-Pacheco and                    |

|                                            |                                                                                                        |                                                           |
|--------------------------------------------|--------------------------------------------------------------------------------------------------------|-----------------------------------------------------------|
| (TrxR)                                     | reducing agent                                                                                         | Gonsebatt 2009                                            |
| Catalase (CAT)                             | Degrades hydrogen peroxide into water and oxygen                                                       | Flores-Nunes, Mattos, et al. 2015; Sussarellu et al. 2012 |
| NAD(P) transhydrogenase (NADPt)            | Involved in maintenance of cellular redox state                                                        | Sussarellu et al. 2010, 2012                              |
| Glucose-6-phosphate 1-dehydrogenase (G6PD) | Catalyzes first step in the pentose phosphate pathway and controls rate of pathway's oxidative portion | Livingstone., 1982                                        |
| Protein phosphatase 1B (PP1)               | Regulation of glycogen metabolism by dephosphorylating glycogen synthase                               | Wu et al. 1998                                            |
| Glycogen phosphorylase (GPH)               | Key glycogen catabolism enzyme. Removes glucose from glycogen molecules to aid in glycogen breakdown   | David et al. 2005; Oyster and Gigas 1993; She et al. 2015 |

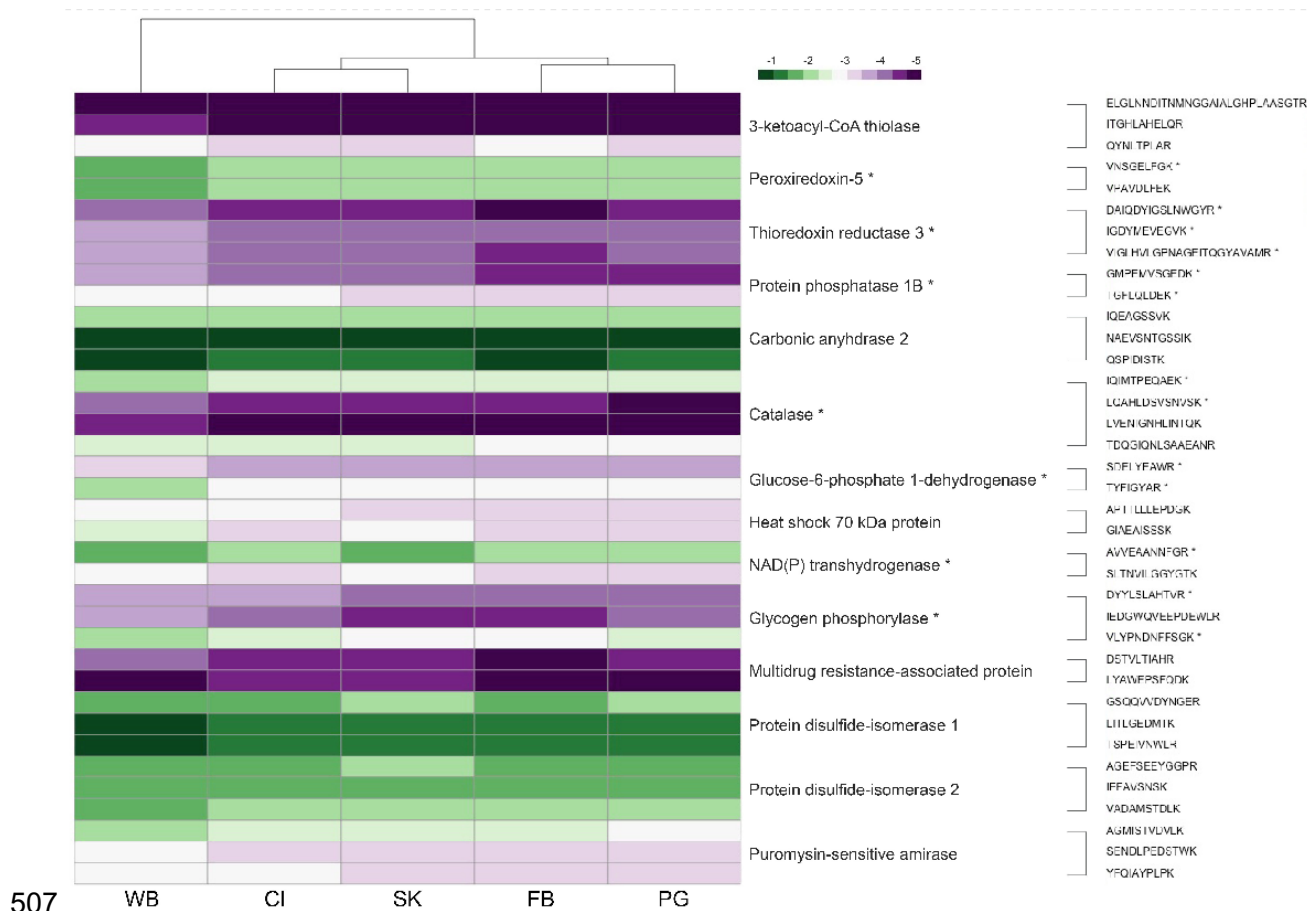

507 WB CI SK FB PG

508

509 **Figure 1.** Average protein abundance by constituent peptides across experimental sites

510 from SRM. Peptide abundance data at each site was averaged, then log transformed.

511 Proteins were considered differentially abundant if at least one constituent peptide was

512 significantly different (indicated by an asterisk). There were no significant differences in

513 protein abundance among the Puget Sound locations, or between unvegetated and

514 eelgrass habitats.

515

516 **Acknowledgements**

517           This work was funded by the Washington State Department of Natural  
518 Resources Interagency Agreement 16-241 and Washington Sea Grant. Brittany Taylor  
519 (Taylor Shellfish) provided *C. gigas* for the outplant experiment. The University of  
520 Washington Proteomic Resource and Priska von Haller assisted with mass  
521 spectrometry. Jarrett Egertson (Department of Genome Sciences) helped design the  
522 DIA acquisition. Austin Keller (Department of Genome Sciences) adapted MSConvert to  
523 correctly demultiplex and convert DIA data files. Sean Bennet (School of Aquatic and  
524 Fishery Sciences), and Han-Yin Yang and Brian Searle (Department of Genome  
525 Sciences) assisted with running Pecan.

526

## 527 References

- 528 Abele, Eoris, Eva Philip, Paula M. Gonzalez, and Susana Puntarulo. 2007. "Marine Invertebrate  
529 Mitochondria and Oxidative Stress." *Frontiers in Bioscience: A Journal and Virtual Library* 12  
530 (January): 933–46.
- 531 Bacca, H., A. Huvet, C. Fabioux, J-Y Daniel, M. Delaporte, S. Pouvreau, A. Van Wormhoudt,  
532 and J. Moal. 2005. "Molecular Cloning and Seasonal Expression of Oyster Glycogen  
533 Phosphorylase and Glycogen Synthase Genes." *Comparative Biochemistry and Physiology. Part B, Biochemistry & Molecular Biology* 140 (4): 635–46.
- 535 Banas, N. S., B. M. Hickey, P. MacCready, and J. A. Newton. 2004. "Dynamics of Willapa Bay,  
536 Washington: A Highly Unsteady, Partially Mixed Estuary." *Journal of Physical Oceanography* 34  
537 (11). American Meteorological Society: 2413–27.
- 538 Banas, N. S., B. M. Hickey, J. A. Newton, and J. L. Ruesink. 2007. "Tidal Exchange, Bivalve  
539 Grazing, and Patterns of Primary Production in Willapa Bay, Washington, USA." *Marine Ecology Progress Series* 341. Inter-Research Science Center: 123–39.
- 541 Beyer, Jonny, Norman W. Green, Steven Brooks, Ian J. Allan, Anders Ruus, Tânia Gomes,  
542 Inger Lise N. Bråte, and Merete Schøyen. 2017. "Blue Mussels (*Mytilus Edulis* Spp.) as Sentinel  
543 Organisms in Coastal Pollution Monitoring: A Review." *Marine Environmental Research* 130  
544 (September): 338–65.
- 545 Bianucci, Laura, Wen Long, Tarang Khangaonkar, Gregory Pelletier, Anise Ahmed, Teizeen  
546 Mohamedali, Mindy Roberts, and Cristiana Figueroa-Kaminsky. 2018. "Sensitivity of the  
547 Regional Ocean Acidification and Carbonate System in Puget Sound to Ocean and Freshwater  
548 Inputs." *Elem Sci Anth* 6 (1): 22.
- 549 Campos, Alexandre, Gabriela Danielsson, Ana Paula Farinha, Jacob Kuruvilla, Per Warholm,  
550 and Susana Cristobal. 2016. "Shotgun Proteomics to Unravel Marine Mussel (*Mytilus Edulis*)  
551 Response to Long-Term Exposure to Low Salinity and Propranolol in a Baltic Sea Microcosm."  
552 *Journal of Proteomics* 137 (March): 97–106.
- 553 Chambers, Matthew C., Brendan Maclean, Robert Burke, Dario Amodei, Daniel L. Ruderman,  
554 Steffen Neumann, Laurent Gatto, et al. 2012. "A Cross-Platform Toolkit for Mass Spectrometry  
555 and Proteomics." *Nature Biotechnology* 30 (10): 918–20.
- 556 Chapman, Robert W., Annalaura Mancina, Marion Beal, Artur Veloso, Charles Rathburn, Anne  
557 Blair, A. F. Holland, et al. 2011. "The Transcriptomic Responses of the Eastern Oyster,  
558 *Crassostrea Virginica*, to Environmental Conditions." *Molecular Ecology* 20 (7): 1431–49.
- 559 Cheney, D. P., B. F. MacDonald, and R. A. Elston. 2000. "Summer Mortality of Pacific Oysters,  
560 *Crassostrea Gigas* (Thunberg): Initial Findings on Multiple Environmental Stressors in Puget  
561 Sound, Washington, 1998." *Journal of Shellfish Research* 19 (1). [S.I. :National Shellfisheries  
562 Association, : 6.
- 563 Cornwall, Christopher E., and Catriona L. Hurd. 2016. "Experimental Design in Ocean  
564 Acidification Research: Problems and Solutions." *ICES Journal of Marine Science: Journal Du  
565 Conseil* 73 (3). Oxford University Press: 572–81.
- 566 Dan Kelley and Clark Richards (2018). *oce: Analysis of Oceanographic Data*. R package  
567 version 0.9-23. <https://CRAN.R-project.org/package=oce>
- 568 David, Elise, Arnaud Tanguy, Karine Pichavant, and Dario Moraga. 2005. "Response of the  
569 Pacific Oyster *Crassostrea Gigas* to Hypoxia Exposure under Experimental Conditions." *The*

- 570 *FEBS Journal* 272 (21): 5635–52.
- 571 Egertson, Jarrett D., Andreas Kuehn, Gennifer E. Merrihew, Nicholas W. Bateman, Brendan X.  
572 MacLean, Ying S. Ting, Jesse D. Canterbury, et al. 2013. “Multiplexed MS/MS for Improved  
573 Data-Independent Acquisition.” *Nature Methods* 10 (8): 744–46.
- 574 Feely, Richard A., Simone R. Alin, Jan Newton, Christopher L. Sabine, Mark Warner, Allan  
575 Devol, Christopher Krembs, and Carol Maloy. 2010. “The Combined Effects of Ocean  
576 Acidification, Mixing, and Respiration on pH and Carbonate Saturation in an Urbanized  
577 Estuary.” *Estuarine, Coastal and Shelf Science* 88 (4): 442–49.
- 578 Flores-Nunes, Fabrício, Tânia Gomes, Rui Company, Roberta R. M. Moraes, Silvio T. Sasaki,  
579 Satie Taniguchi, Márcia C. Bicego, Cláudio M. R. Melo, Afonso C. D. Bainy, and Maria J.  
580 Bebianno. 2015. “Changes in Protein Expression of Pacific Oyster *Crassostrea Gigas* Exposed  
581 in Situ to Urban Sewage.” *Environmental Science and Pollution Research International* 22 (22):  
582 17267–79.
- 583 Flores-Nunes, Fabrício, Jacó J. Mattos, Flávia L. Zacchi, Miguel A. S. Serrano, Clei E. Piazza,  
584 Silvio T. Sasaki, Satie Taniguchi, Márcia C. Bicego, Cláudio M. R. Melo, and Afonso C. D.  
585 Bainy. 2015. “Effect of Linear Alkylbenzene Mixtures and Sanitary Sewage in Biochemical and  
586 Molecular Responses in Pacific Oyster *Crassostrea Gigas*.” *Environmental Science and  
587 Pollution Research* 22 (22): 17386–96.
- 588 Fuhrmann, Marine, Lizenn Delisle, Bruno Petton, Charlotte Corporeau, and Fabrice Pernet.  
589 2018. “Metabolism of the Pacific oyster, *Crassostrea Gigas*, Is Influenced by Salinity and  
590 Modulates Survival to the Ostreid Herpesvirus OsHV-1.” *Biology Open* 7 (2).  
591 <https://doi.org/10.1242/bio.028134>.
- 592 Hamdoun, Amro M., Daniel P. Cheney, and Gary N. Cherr. 2003. “Phenotypic Plasticity of  
593 HSP70 and HSP70 Gene Expression in the Pacific Oyster (*Crassostrea Gigas*): Implications for  
594 Thermal Limits and Induction of Thermal Tolerance.” *The Biological Bulletin* 205 (2): 160–69.
- 595 Hoaglin, David C., Boris Iglewicz, and John W. Tukey. 1986. “Performance of Some Resistant  
596 Rules for Outlier Labeling.” *Journal of the American Statistical Association* 81 (396). Taylor &  
597 Francis: 991–99.
- 598 Kültz, Dietmar, Johnathon Li, Xuezheng Zhang, Fernando Villarreal, Tuan Pham, and Darlene  
599 Paguio. 2015. “Population-Specific Plasma Proteomes of Marine and Freshwater Three-Spined  
600 Sticklebacks (*Gasterosteus Aculeatus* ).” *Proteomics* 15 (23-24): 3980–92.
- 601 Limón-Pacheco, Jorge, and María E. Gonsebatt. 2009. “The Role of Antioxidants and  
602 Antioxidant-Related Enzymes in Protective Responses to Environmentally Induced Oxidative  
603 Stress.” *Mutation Research* 674 (1-2): 137–47.
- 604 Liu, Zhiyong, Shaoming Pan, Zhuyou Sun, Renfeng Ma, Lanhua Chen, Yanlong Wang, and  
605 Shuao Wang. 2015. “Heavy Metal Spatial Variability and Historical Changes in the Yangtze  
606 River Estuary and North Jiangsu Tidal Flat.” *Marine Pollution Bulletin* 98 (1-2): 115–29.
- 607 L., Mussel *Mytilus Edulis*. n.d. “INDUCTION OF ENZYMES AS A MECHANISM FOR THE  
608 SEASONAL CONTROL OF METABOLISM IN MARINE INVERTEBRATES: GLUCOSE-6-  
609 PHOSPHATE DEHYDROGENASES FROM THE MANTLE AND HEPATOPANCREAS OF THE  
610 COMMON.”
- 611 Lockwood, Brent L., and George N. Somero. 2011. “Transcriptomic Responses to Salinity  
612 Stress in Invasive and Native Blue Mussels (genus *Mytilus* ).” *Molecular Ecology* 20 (3): 517–29.
- 613 Lowe, Alexander T. et al. “Growth and fatty acid composition differences in outplanted Pacific



614 oysters” *in prep.*

615 MacLean, Brendan, Daniela M. Tomazela, Nicholas Shulman, Matthew Chambers, Gregory L.  
616 Finney, Barbara Frewen, Randall Kern, David L. Tabb, Daniel C. Liebler, and Michael J.  
617 MacCoss. 2010. “Skyline: An Open Source Document Editor for Creating and Analyzing  
618 Targeted Proteomics Experiments.” *Bioinformatics* 26 (7): 966–68.

619 Meistertzheim, Anne-Leila, Arnaud Tanguy, Dario Moraga, and Marie-Thérèse Thébault. 2007.  
620 “Identification of Differentially Expressed Genes of the Pacific Oyster *Crassostrea Gigas*  
621 Exposed to Prolonged Thermal Stress.” *The FEBS Journal* 274 (24): 6392–6402.

622 Meng, Jie, Wenxiong Wang, Li Li, Qi Yin, and Guofan Zhang. 2017. “Cadmium Effects on DNA  
623 and Protein Metabolism in Oyster (*Crassostrea Gigas*) Revealed by Proteomic Analyses.”  
624 *Scientific Reports* 7 (1): 11716.

625 Oyster, O. F. The, and *Crassostrea Gigas*. 1993. “PURIFICATION AND PROPERTIES OF  
626 GLYCOGEN PHOSPHORYLASE FROM THE ADDUCTOR MUSCLE.” *Planning Perspectives:*  
627 *PP* 481: 486.

628 Pacella, Stephen R., Cheryl A. Brown, George G. Waldbusser, Rochelle G. Labiosa, and Burke  
629 Hales. 2018. “Seagrass Habitat Metabolism Increases Short-Term Extremes and Long-Term  
630 Offset of CO<sub>2</sub> under Future Ocean Acidification.” *Proceedings of the National Academy of*  
631 *Sciences of the United States of America*, April. <https://doi.org/10.1073/pnas.1703445115>.

632 Paerl, Hans W., Nathan S. Hall, Benjamin L. Peierls, and Karen L. Rossignol. 2014. “Evolving  
633 Paradigms and Challenges in Estuarine and Coastal Eutrophication Dynamics in a Culturally  
634 and Climatically Stressed World.” *Estuaries and Coasts* 37 (2): 243–58.

635 Papakostas, Spiros, Anti Vasemägi, Juha-Pekka Vähä, Mikael Himberg, Lauri Peil, and Craig R.  
636 Primmer. 2012. “A Proteomics Approach Reveals Divergent Molecular Responses to Salinity in  
637 Populations of European Whitefish (*Coregonus Lavaretus*).” *Molecular Ecology* 21 (14): 3516–  
638 30.

639 Parker, Laura, Pauline Ross, David Raftos, Emma Thompson, and Wayne O’Connor. 2011.  
640 “The Proteomic Response of Larvae of the Sydney Rock Oyster, *Saccostrea Glomerata* to  
641 Elevated P CO<sub>2</sub>.” *The Australian Zoologist* 35 (4). Royal Zoological Society of NSW: 1011–23.

642 Pelletier, Gregory, Mindy Roberts, Mya Keyzers, and Simone R. Alin. 2018. “Seasonal Variation  
643 in Aragonite Saturation in Surface Waters of Puget Sound – a Pilot Study.”  
644 <https://doi.org/10.1525/elementa.270>.

645 Pennock, Jonathan R., and Jonathan H. Sharp. 1986. “Phytoplankton Production in the  
646 Delaware Estuary: Temporal and Spatial Variability.” *Marine Ecology Progress Series* 34 (1/2).  
647 Inter-Research Science Center: 143–55.

648 Plumel, Marine I., Thierry Wasselin, Virginie Plot, Jean-Marc Strub, Alain Van Dorsselaer,  
649 Christine Carapito, Jean-Yves Georges, and Fabrice Bertile. 2013. “Mass Spectrometry-Based  
650 Sequencing and SRM-Based Quantitation of Two Novel Vitellogenin Isoforms in the  
651 Leatherback Sea Turtle (*Dermochelys Coriacea*).” *Journal of Proteome Research* 12 (9): 4122–  
652 35.

653 R Core Team (2018). R: A language and environment for statistical computing. R Foundation for  
654 Statistical Computing, Vienna, Austria. URL <https://www.R-project.org/>.

655 Riebesell, Ulf, and Jean-Pierre Gattuso. 2014. “Lessons Learned from Ocean Acidification  
656 Research.” *Nature Climate Change* 5 (December). Nature Publishing Group, a division of  
657 Macmillan Publishers Limited. All Rights Reserved.: 12.



- 658 Ruesink, J. L., A. Sarich, and A. C. Trimble. 2018. "Similar Oyster Reproduction across  
659 Estuarine Regions Differing in Carbonate Chemistry." *ICES Journal of Marine Science: Journal*  
660 *Du Conseil* 75 (1). Oxford University Press: 340–50.
- 661 Serrano, Fuencisla San Juan, Pilar Suarez Alonso, Marta Lombraña Tascon, and L. Oscar  
662 Garcia Martin. 1993. "Effect of Temperature on Glycogen Phosphorylase Activity of *Mytilus*  
663 *Galloprovincialis* Mantle Tissue." In *Actas Del IV Congreso Nacional de Acuicultura, Centro de*  
664 *Investigaciones Marinas, Pontevedra (Spain)*, 425–30.
- 665 She, Zhicai, Li Li, Haigang Qi, Kai Song, Huayong Que, and Guofan Zhang. 2015. "Candidate  
666 Gene Polymorphisms and Their Association with Glycogen Content in the Pacific Oyster  
667 *Crassostrea Gigas*." *PLoS One* 10 (5): e0124401.
- 668 Silbiger, Nyssa J., and Cascade J. B. Sorte. 2018. "Biophysical Feedbacks Mediate Carbonate  
669 Chemistry in Coastal Ecosystems across Spatiotemporal Gradients." *Scientific Reports* 8 (1):  
670 796.
- 671 Slattery, Marc, Sridevi Ankisetty, Jone Corrales, K. Erica Marsh-Hunkin, Deborah J. Gochfeld,  
672 Kristine L. Willett, and John M. Riboldi. 2012. "Marine Proteomics: A Critical Assessment of an  
673 Emerging Technology." *Journal of Natural Products* 75 (10): 1833–77.
- 674 Sussarellu, Rossana, Caroline Fabioux, Miguel Camacho Sanchez, Nelly Le Goïc, Christophe  
675 Lambert, Philippe Soudant, and Dario Moraga. 2012. "Molecular and Cellular Response to  
676 Short-Term Oxygen Variations in the Pacific Oyster *Crassostrea Gigas*." *Journal of*  
677 *Experimental Marine Biology and Ecology* 412 (January): 87–95.
- 678 Sussarellu, Rossana, Caroline Fabioux, Gilles Le Moullac, Elodie Fleury, and Dario Moraga.  
679 2010. "Transcriptomic Response of the Pacific Oyster *Crassostrea Gigas* to Hypoxia." *Marine*  
680 *Genomics* 3 (3-4): 133–43.
- 681 Timmins-Schiffman, Emma B., Grace A. Crandall, Brent Vadopalas, Michael E. Riffle, Brook L.  
682 Nunn, and Steven B. Roberts. 2016. "Integrating Discovery-Driven Proteomics and Selected  
683 Reaction Monitoring to Develop a Non-Invasive Assay for Geoduck Reproductive Maturation."  
684 *bioRxiv*. <https://doi.org/10.1101/094615>.
- 685 ———. 2017. "Integrating Discovery-Driven Proteomics and Selected Reaction Monitoring To  
686 Develop a Noninvasive Assay for Geoduck Reproductive Maturation." *Journal of Proteome*  
687 *Research* 16 (9): 3298–3309.
- 688 Timmins-Schiffman, Emma, William D. Coffey, Wilber Hua, Brook L. Nunn, Gary H. Dickinson,  
689 and Steven B. Roberts. 2014. "Shotgun Proteomics Reveals Physiological Response to Ocean  
690 Acidification in *Crassostrea Gigas*." *BMC Genomics* 15 (November): 951.
- 691 Ting, Ying S., Jarrett D. Egertson, Samuel H. Payne, Sangtae Kim, Brendan MacLean, Lukas  
692 Käll, Ruedi Aebersold, Richard D. Smith, William Stafford Noble, and Michael J. MacCoss.  
693 2015. "Peptide-Centric Proteome Analysis: An Alternative Strategy for the Analysis of Tandem  
694 Mass Spectrometry Data." *Molecular & Cellular Proteomics: MCP* 14 (9): 2301–7.
- 695 Tomanek, Lars. 2014. "Proteomics to Study Adaptations in Marine Organisms to Environmental  
696 Stress." *Journal of Proteomics* 105 (June): 92–106.
- 697 Veldhoen, Nik, Michael G. Ikonomou, and Caren C. Helbing. 2012. "Molecular Profiling of  
698 Marine Fauna: Integration of Omics with Environmental Assessment of the World's Oceans."  
699 *Ecotoxicology and Environmental Safety* 76 (2): 23–38.
- 700 Wu, J., J. Liu, I. Thompson, C. J. Oliver, S. Shenolikar, and D. L. Brautigam. 1998. "A Conserved  
701 Domain for Glycogen Binding in Protein Phosphatase-1 Targeting Subunits." *FEBS Letters* 439

702 (1-2): 185–91.  
703 Zhang, Yang, Jin Sun, Huawei Mu, Jun Li, Yuehuan Zhang, Fengjiao Xu, Zhiming Xiang, Pei-  
704 Yuan Qian, Jian-Wen Qiu, and Ziniu Yu. 2015. “Proteomic Basis of Stress Responses in the  
705 Gills of the Pacific Oyster *Crassostrea Gigas*.” *Journal of Proteome Research* 14 (1): 304–17.
